# Supplementary material for: A cerium oxide nanoparticle-based device for the detection of chronic inflammation via optical and magnetic resonance imaging
Source: Royal Society of Chemistry journal article supplement (doi:10.1039/c2nr11956k), 2012-01-01
Supplement: c2nr11956k.pdf [file c2nr11956k.pdf]

## A Cerium Oxide Nanoparticle-based Device for the Detection of Chronic Inflammation via Optical and Magnetic Resonance Imaging

Charalambos Kaittanis,<sup>a</sup> Santimukul Santra,<sup>a</sup> Atul Asati,<sup>a</sup> J. Manuel Perez<sup>ab\*</sup>

<sup>a</sup>Nanoscience Technology Center, University of Central Florida, Orlando, FL, USA,

<sup>b</sup>Department of Chemistry, University of Central Florida, Orlando, FL, USA

\* 12424 Research Pkwy, Ste 400, Orlando, FL 32826, USA. Email: jmperez@ucf.edu

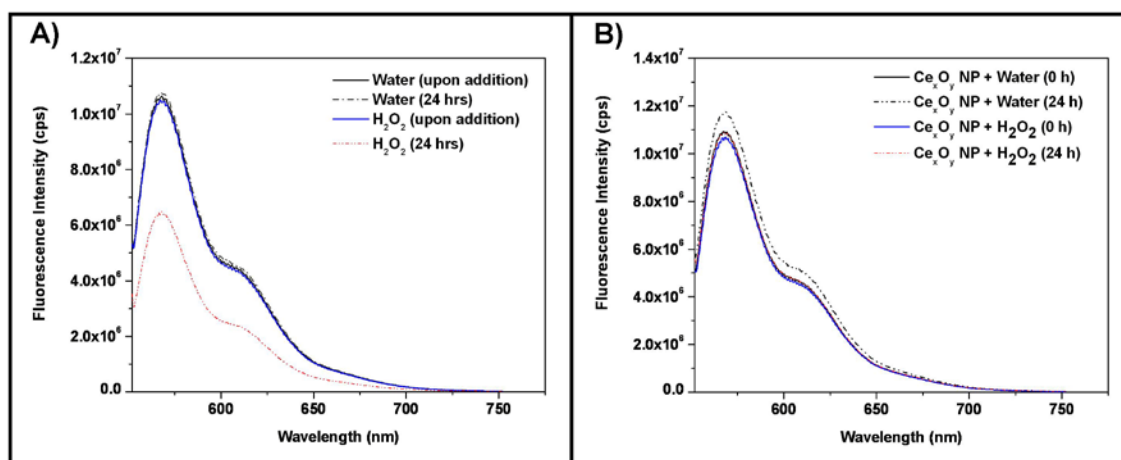

**ESI Fig. 1.** Behavior of the fluorophore DiI in the presence of H<sub>2</sub>O<sub>2</sub>. **A)** Decrease in the dye's fluorescence emission after 24-h incubation with H<sub>2</sub>O<sub>2</sub> (1 μM). **B)** Cerium oxide nanoparticles (Ce<sub>x</sub>O<sub>y</sub> NP) preserve DiI's fluorescence emission from hydrogen peroxide.

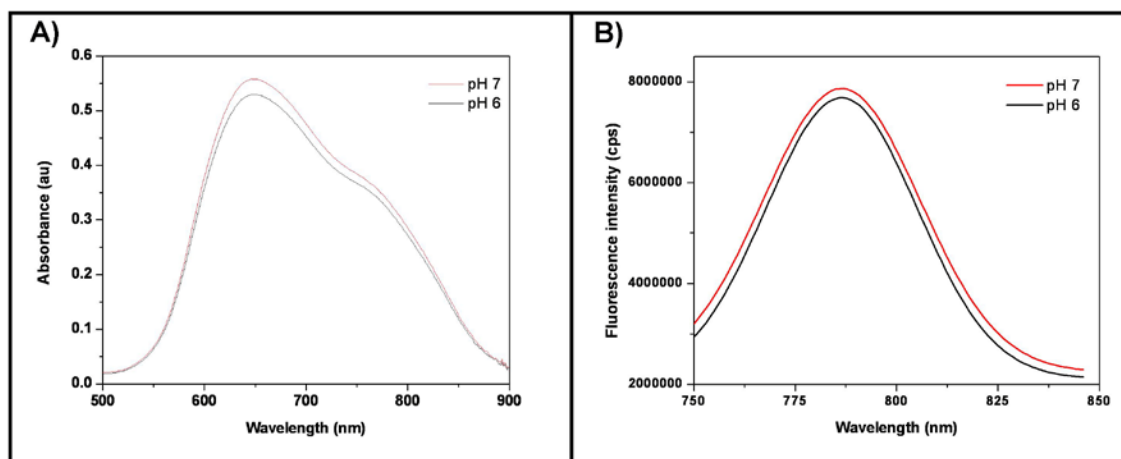

**ESI Fig. 2.** The near-infrared fluorophore DiR is stable fluorescence emission at physiological and acidic pH. **(A)** Absorbance and **(B)** fluorescence emission spectra are depicted.

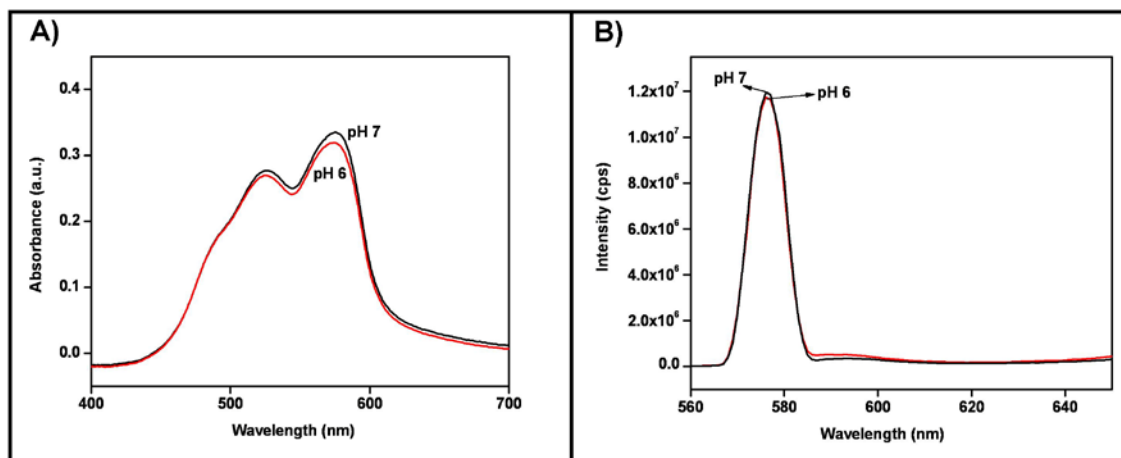

**ESI Fig. 3.** The indocyanine fluorophore DiI exhibits stable fluorescence emission at physiological and acidic pH. (A) Absorbance and (B) fluorescence emission spectra.

**ESI Table 1.** Loss of Ce<sub>x</sub>O<sub>y</sub> NP's antioxidant activity at acidic conditions or high concentrations of hydrogen peroxide is attributed to the changes on the nanoparticles' mixed valence (Ce<sup>+3</sup>/Ce<sup>+4</sup>) state, preventing them to regenerate.

| Ce <sub>x</sub> O <sub>y</sub> NP         | Ce <sup>+3</sup> | Ce <sup>+4</sup> |                 |
|-------------------------------------------|------------------|------------------|-----------------|
| 0 μM H <sub>2</sub> O <sub>2</sub> (pH 7) | 57 %             | 43 %             |                 |
| 0 μM H <sub>2</sub> O <sub>2</sub> (pH 6) | 61 %             | 39 %             |                 |
| 1 μM H <sub>2</sub> O <sub>2</sub> (pH 7) | 58 %             | 42 %             | Regeneration    |
| 1 μM H <sub>2</sub> O <sub>2</sub> (pH 6) | 44 %             | 56 %             | No Regeneration |
| 6 μM H <sub>2</sub> O <sub>2</sub> (pH 7) | 39 %             | 61 %             |                 |
